# Supplementary material
Source: PubMed Central journal article supplement (PMC8816359)
Supplement: ptc-2019-0104_appendix1.pdf [file ptc-2019-0104_appendix1.pdf]

## ANNEXE 1 LISTE BIBLIOGRAPHIQUE DES 15 REVUES SYSTÉMATIQUES, RÉDIGÉES EN FRANÇAIS, SÉLECTIONNÉES POUR L'ÉTUDE DE FIDÉLITÉ INTERJUGES

- Alvado A, Pélissier J, Bénaim C et coll. Les traitements physiques dans la rétraction capsulaire de l'épaule : revue de la littérature. *Ann Readapt Med Phys*. 2001;44(2):59–71. [https://doi.org/10.1016/S0168-6054\(00\)00062-3](https://doi.org/10.1016/S0168-6054(00)00062-3).
- Beaucage C, Cardinal L, Kavanagh M et coll. La dépression majeure en première ligne et les impacts cliniques des stratégies d'intervention : une revue de la littérature. *Sante Ment Que*. 2009;34(1):77–98. <https://doi.org/10.7202/029760ar>.
- Bujold M, Henry J, Pearson J et coll. Les jugements de contingence chez les individus dépressifs et non dépressifs : un méta-analyse. *Rev Queb Psychol*. 2018;39(1):205–29. <https://doi.org/10.7202/1044851ar>.
- Faleschini S, Boucher N. Effets psychosociaux des activités visant à soutenir les jeunes adultes en situation de handicap : une recension des écrits. *Serv Soc*. 2016;62(1):33–48. <https://doi.org/10.7202/1038575ar>.
- Fansi A, Jehanno C, Lapalme M et coll. Efficacité de la psychothérapie comparativement à la pharmacothérapie dans le traitement des troubles anxieux et dépressifs chez l'adulte : une revue de la littérature. *Sante Ment Que*. 2015;40(4):141–73. <https://doi.org/10.7202/1036098ar>.
- Gervais A, O'Loughlin J, Dugas E et coll. Revue systématique d'essais comparatifs randomisés d'interventions d'abandon du tabac chez les jeunes. *Drogues, santé et société*. 2007;6(1):283–316. <https://doi.org/10.7202/016950ar>.
- Gremeaux V, Coudeyre E, Hérisson C et coll. La qualité de l'information disponible sur Internet concernant la lombalgie est-elle adaptée aux attentes des patients? Revue systématique. *Ann Readapt Med Phys*. 2007;50(2):85–92. <https://doi.org/10.1016/j.annrmp.2006.09.003>.
- Noël L, Gagnon D. Revue systématique d'interventions par des pairs usagers de drogues par injection. *Drogues, santé et société*. 2013;12(1):1–18. <https://doi.org/10.7202/1021536ar>.
- Ouimet MC, Averill F, Brown TG. L'efficacité de l'entretien motivationnel dans la prévention secondaire et tertiaire de la conduite avec les capacités affaiblies par l'alcool : une revue systématique de la documentation. *Drogues, santé et société*. 2014;13(2):84–108. <https://doi.org/10.7202/1032274ar>.
- Potvin S, Pelletier J, Stip E. La conscience des déficits neurocognitifs dans la schizophrénie: une méta-analyse. *Sante Ment Que*. 2014;39(2):183–200. <https://doi.org/10.7202/1027839ar>.
- Smets F, Croisier J-L, Forthomme B et coll. Applications cliniques du plasma riche en plaquettes (PRP) dans les lésions tendineuses : revue de la littérature. *Sci Sports*. 2012;27(3):141–53. <https://doi.org/10.1016/j.scispo.2011.12.007>.
- St-Amour N, Léveillé S, Wilkins J. La cyberthérapie dans le traitement de l'hyperphagie boulimique : recension de la littérature. *Rev Queb Psychol*. 2016;37(1):61–86. <https://doi.org/10.7202/1040104ar>.
- Thoumie P, Postel J-M, Missaoui B, Biau D et coll. Intérêt de la mobilisation passive continue par rapport aux mobilisations intermittentes après pose d'une prothèse totale de genou. Élaboration de recommandations françaises pour la pratique clinique. *Ann Readapt Med Phys*. 2007;50(4):244–50. <https://doi.org/10.1016/j.annrmp.2007.03.001>.
- Tiffreau V, Mulleman D, Coudeyre E et coll. Intérêt des programmes d'exercices en groupe ou en individuel dans l'arthrose des membres inférieurs. Élaboration de recommandations françaises pour la pratique clinique. *Ann Readapt Med*. 2007;50(9):734–40. <https://doi.org/10.1016/j.annrmp.2007.09.003>.
- Karl V, Maigne JY, Fischhoff C et coll. Analyse systématique de l'efficacité des thérapeutiques manuelles dans la cervicalgie commune. *Rev Rhum Ed Fr*. 2012;80(5):503–11. <https://doi.org/10.1016/j.rhum.2012.09.008>.

## ANNEXE 2 EXEMPLES DE DIVERGENCES DE TRADUCTION POUR CERTAINS POINTS DE L'AMSTAR 2 LORS DE LA PREMIÈRE ÉTAPE (TRP)

| Point | Traducteurs professionnels                                                                                                                                                         | Traducteurs cliniciens                                                                                                                                                    |
|-------|------------------------------------------------------------------------------------------------------------------------------------------------------------------------------------|---------------------------------------------------------------------------------------------------------------------------------------------------------------------------|
| 1.    | Est-ce que les questions de recherche et les critères d'inclusion pour la revue systématique incluent les <b>composantes</b> PICO?                                                 | Est-ce que la question de recherche et les critères d'inclusion de la revue incluent les <b>éléments</b> PICO?                                                            |
| 3.    | Est-ce que les auteurs de la revue expliquent leur sélection des <b>devis</b> d'études inclus dans la revue?                                                                       | Est-ce que les auteurs de la revue ont expliqué la sélection des <b>modèles</b> d'étude inclus dans la revue?                                                             |
| 5.    | Est-ce que les auteurs de la revue <b>effectuent</b> la sélection des études en double?                                                                                            | Est-ce que les auteurs de la revue <b>ont réalisé</b> une sélection des études en double?                                                                                 |
| 6.    | Est-ce que les auteurs de la revue effectuent une <b>extraction</b> des données en double?                                                                                         | Est-ce que les auteurs ont fait une <b>récupération</b> des données en double?                                                                                            |
| 9.    | Est-ce que les auteurs de la revue utilisent une technique satisfaisante pour évaluer le risque de biais pour <b>chaque étude</b> qui a été incluse?                               | Est-ce que les auteurs ont utilisé une technique satisfaisante pour évaluer le risque de biais des <b>études individuelles</b> incluses dans la revue?                    |
| 10.   | Est-ce que les auteurs de la revue <b>déclarent</b> les sources de financement pour les études dans la revue?                                                                      | Est-ce que les auteurs de la revue <b>ont déclaré</b> les sources de financement des études incluses dans la revue?                                                       |
| 14.   | Est-ce que les auteurs de la revue <b>fournissent</b> une explication satisfaisante ainsi qu'une discussion de toute hétérogénéité <b>observée</b> dans les résultats de la revue? | Est-ce que les auteurs de la revue <b>ont offert</b> une explication et une analyse satisfaisante de toute hétérogénéité <b>constatée</b> dans les résultats de la revue? |

**ANNEXE 3 SCORE MOYEN D'AMBIGUÏTÉ DES ÉNONCÉS DE L'OUTIL AMSTAR 2 PAR 20 UTILISATEURS**

| Éléments | Énoncés de l'outil AMSTAR 2                                                                                                                                                                                                                                 | Moyenne (écart-type) |
|----------|-------------------------------------------------------------------------------------------------------------------------------------------------------------------------------------------------------------------------------------------------------------|----------------------|
|          | AMSTAR 2 : Un outil d'évaluation critique de la qualité de revues systématiques qui incluent des études d'intervention en soins de santé randomisées ou non randomisées                                                                                     | 1,1 (0,2)            |
| 1.       | Est-ce que les questions de recherche et les critères d'inclusion de la revue systématique comprenaient les composantes PICO?                                                                                                                               | 1,2 (0,7)            |
|          | Si « oui » :                                                                                                                                                                                                                                                | 1,3 (0,4)            |
|          | <input type="checkbox"/> Population                                                                                                                                                                                                                         |                      |
|          | <input type="checkbox"/> Intervention                                                                                                                                                                                                                       |                      |
|          | <input type="checkbox"/> Groupes de comparaison                                                                                                                                                                                                             |                      |
|          | <input type="checkbox"/> Résultats (Outcome)                                                                                                                                                                                                                |                      |
|          | Optionnel (recommandé)                                                                                                                                                                                                                                      |                      |
|          | <input type="checkbox"/> Échéancier pour les suivis                                                                                                                                                                                                         |                      |
| 2.       | Est-ce que le compte rendu de la revue systématique contenait un énoncé explicite indiquant que les méthodes de cette revue ont été établies avant de la réaliser, et est-ce qu'il y avait une justification de toute déviation significative du protocole? | 1,9 (1,1)            |
|          | Si « oui en partie » :                                                                                                                                                                                                                                      | 1,1 (0,5)            |
|          | Les auteurs déclarent avoir écrit un protocole ou un guide qui inclut TOUS les éléments suivants :                                                                                                                                                          |                      |
|          | <input type="checkbox"/> La (Les) question(s) de recherche                                                                                                                                                                                                  |                      |
|          | <input type="checkbox"/> Une stratégie de recherche                                                                                                                                                                                                         |                      |
|          | <input type="checkbox"/> Les critères d'inclusion et d'exclusion                                                                                                                                                                                            |                      |
|          | <input type="checkbox"/> Une évaluation des risques de biais                                                                                                                                                                                                |                      |
|          | Si « oui » :                                                                                                                                                                                                                                                | 2,2 (1,4)            |
|          | En plus des critères du « oui en partie », le protocole devrait être enregistré et devrait avoir spécifié :                                                                                                                                                 |                      |
|          | <input type="checkbox"/> Un plan de la méta-analyse/synthèse si nécessaire <i>et</i>                                                                                                                                                                        |                      |
|          | <input type="checkbox"/> Un plan pour examiner les causes d'hétérogénéité                                                                                                                                                                                   |                      |
|          | <input type="checkbox"/> Une justification pour toutes déviations du protocole                                                                                                                                                                              |                      |
| 3.       | Est-ce que les auteurs ont expliqué leurs méthodes de sélection des devis d'études inclus dans la revue systématique?                                                                                                                                       | 1,4 (0,8)            |
|          | Si « oui », la revue devrait inclure l'UN des éléments suivants :                                                                                                                                                                                           | 1,2 (0,4)            |
|          | <input type="checkbox"/> Une explication pour avoir inclus uniquement des essais cliniques randomisés (ECR)                                                                                                                                                 |                      |
|          | <input type="checkbox"/> OU une explication pour avoir inclus uniquement des études d'intervention non randomisées (EINR)                                                                                                                                   |                      |
|          | <input type="checkbox"/> OU une explication pour avoir inclus les deux : ECR et EINR                                                                                                                                                                        |                      |
| 4.       | Est-ce que les auteurs de la revue systématique ont utilisé une stratégie de recherche exhaustive des écrits?                                                                                                                                               | 1,4 (0,8)            |
|          | Si « oui en partie », TOUS les éléments suivants s'appliquent :                                                                                                                                                                                             | 1,7 (1,4)            |
|          | <input type="checkbox"/> Avoir effectué leur recherche dans au moins deux bases de données (pertinentes à la question de recherche)                                                                                                                         |                      |
|          | <input type="checkbox"/> Avoir fourni des mots-clés ou des stratégies de recherche                                                                                                                                                                          |                      |
|          | <input type="checkbox"/> Avoir justifié les contraintes de publication (p. ex., la langue)                                                                                                                                                                  |                      |
|          | Si « oui », il devrait aussi y avoir TOUS les éléments suivants :                                                                                                                                                                                           | 1,7 (1,2)            |
|          | <input type="checkbox"/> Toutes les bibliographies/listes de références des études incluses ont été consultées                                                                                                                                              |                      |
|          | <input type="checkbox"/> Les registres d'essais/d'études ont été consultés                                                                                                                                                                                  |                      |
|          | <input type="checkbox"/> Des experts du domaine ont été inclus/consultés                                                                                                                                                                                    |                      |
|          | <input type="checkbox"/> Lorsque la situation le justifie, la littérature grise a été consultée                                                                                                                                                             |                      |
|          | <input type="checkbox"/> Les recherches ont été effectuées à l'intérieur de 24 mois précédant la fin de la revue systématique                                                                                                                               |                      |
| 5.       | Est-ce que la sélection des études de la revue systématique a été effectuée par au moins 2 évaluateurs?                                                                                                                                                     | 1,0 (0,0)            |
|          | Si « oui », choisir l'UN des éléments suivants :                                                                                                                                                                                                            | 1,1 (0,2)            |
|          | <input type="checkbox"/> Au moins deux évaluateurs ont sélectionné de manière indépendante les études admissibles et sont parvenus à un consensus sur le choix des études à inclure                                                                         |                      |
|          | <input type="checkbox"/> OU deux évaluateurs ont sélectionné un échantillon d'études admissibles et sont parvenus à un accord d'au moins 80 pour cent; les autres données ont été extraites par un des évaluateurs                                          |                      |

(suite)

Tableau (suite)

| Éléments                                                                                                                                  | Énoncés de l'outil AMSTAR 2                                                                                                                                                                                                                                                                                                                                                                                             | Moyenne (écart-type) |
|-------------------------------------------------------------------------------------------------------------------------------------------|-------------------------------------------------------------------------------------------------------------------------------------------------------------------------------------------------------------------------------------------------------------------------------------------------------------------------------------------------------------------------------------------------------------------------|----------------------|
| 6.                                                                                                                                        | Est-ce que l'extraction des données a été effectuée par au moins deux évaluateurs?                                                                                                                                                                                                                                                                                                                                      | 1,2 (0,4)            |
|                                                                                                                                           | Si « oui », choisir l'UN des éléments suivants :<br><input type="checkbox"/> Au moins deux évaluateurs sont parvenus à un consensus sur les données à extraire dans les études retenues<br><input type="checkbox"/> OU deux évaluateurs ont extrait les données d'un échantillon d'études admissibles et sont parvenus à un accord d'au moins 80 pour cent; les autres données ont été extraites par un des évaluateurs | 1,1 (0,4)            |
| 7.                                                                                                                                        | Est-ce que les auteurs de la revue systématique ont fourni une liste des études exclues et ont justifié leurs exclusions?                                                                                                                                                                                                                                                                                               | 1,0 (0,0)            |
|                                                                                                                                           | Si « oui en partie » :                                                                                                                                                                                                                                                                                                                                                                                                  | 1,4 (0,6)            |
|                                                                                                                                           | <input type="checkbox"/> Une liste de toutes les études potentiellement pertinentes qui ont été consultées sous forme de texte intégral, mais exclues de la revue, est fournie                                                                                                                                                                                                                                          |                      |
|                                                                                                                                           | Si « oui », il doit aussi y avoir :<br><input type="checkbox"/> Une justification de l'exclusion de chacune des études potentiellement pertinentes                                                                                                                                                                                                                                                                      | 1,0 (0,0)            |
| 8.                                                                                                                                        | Est-ce que les auteurs de la revue systématique ont décrit les études incluses avec suffisamment de détails?                                                                                                                                                                                                                                                                                                            | 1,0 (0,0)            |
|                                                                                                                                           | Si « oui en partie », TOUS les éléments suivants s'appliquent :                                                                                                                                                                                                                                                                                                                                                         | 1,0 (0,0)            |
|                                                                                                                                           | <input type="checkbox"/> Description des populations                                                                                                                                                                                                                                                                                                                                                                    |                      |
|                                                                                                                                           | <input type="checkbox"/> Description des interventions                                                                                                                                                                                                                                                                                                                                                                  |                      |
|                                                                                                                                           | <input type="checkbox"/> Description des groupes de comparaison                                                                                                                                                                                                                                                                                                                                                         |                      |
|                                                                                                                                           | <input type="checkbox"/> Description des résultats                                                                                                                                                                                                                                                                                                                                                                      |                      |
|                                                                                                                                           | <input type="checkbox"/> Description des devis de recherche                                                                                                                                                                                                                                                                                                                                                             |                      |
|                                                                                                                                           | Si « oui », il devrait aussi y avoir TOUS les éléments suivants :                                                                                                                                                                                                                                                                                                                                                       | 1,3 (1,0)            |
|                                                                                                                                           | <input type="checkbox"/> Description de la population de façon détaillée                                                                                                                                                                                                                                                                                                                                                |                      |
|                                                                                                                                           | <input type="checkbox"/> Description des interventions de façon détaillée (incluant les dosages, lorsque la situation l'indique)                                                                                                                                                                                                                                                                                        |                      |
| <input type="checkbox"/> Description des groupes de comparaison de façon détaillée (incluant les dosages, lorsque la situation l'indique) |                                                                                                                                                                                                                                                                                                                                                                                                                         |                      |
| <input type="checkbox"/> Description du milieu de l'étude de façon détaillée                                                              |                                                                                                                                                                                                                                                                                                                                                                                                                         |                      |
| <input type="checkbox"/> Échéancier pour les suivis                                                                                       |                                                                                                                                                                                                                                                                                                                                                                                                                         |                      |
| 9.                                                                                                                                        | Est-ce que les auteurs ont utilisé une technique satisfaisante pour évaluer le risque de biais pour chacune des études incluses dans la revue systématique?                                                                                                                                                                                                                                                             | 1,1 (0,2)            |
|                                                                                                                                           | ECR                                                                                                                                                                                                                                                                                                                                                                                                                     | 2,0 (1,4)            |
|                                                                                                                                           | Si « oui en partie », avoir évalué les risques de biais suivants :                                                                                                                                                                                                                                                                                                                                                      |                      |
|                                                                                                                                           | <input type="checkbox"/> Une assignation non dissimulée <i>et</i>                                                                                                                                                                                                                                                                                                                                                       |                      |
|                                                                                                                                           | <input type="checkbox"/> L'absence de mise à l'insu des patients et des évaluateurs lors de l'évaluation des résultats (non nécessaire pour des résultats objectifs, tels que les mortalités toutes causes confondues)                                                                                                                                                                                                  |                      |
|                                                                                                                                           | Si « oui », avoir évalué les risques de biais suivants :                                                                                                                                                                                                                                                                                                                                                                | 1,2 (0,5)            |
|                                                                                                                                           | <input type="checkbox"/> Une séquence d'assignation partiellement randomisée <i>et</i>                                                                                                                                                                                                                                                                                                                                  |                      |
|                                                                                                                                           | <input type="checkbox"/> La présentation de résultats sélectionnés parmi plusieurs mesures ou analyses d'un résultat spécifique                                                                                                                                                                                                                                                                                         |                      |
|                                                                                                                                           | <input type="checkbox"/> Inclut seulement des EINR                                                                                                                                                                                                                                                                                                                                                                      | 1,0 (0,0)            |
|                                                                                                                                           | EINR                                                                                                                                                                                                                                                                                                                                                                                                                    | 1,2 (0,7)            |
| Si « oui en partie », avoir évalué les risques de biais provenant de :                                                                    |                                                                                                                                                                                                                                                                                                                                                                                                                         |                      |
| <input type="checkbox"/> Variables confondantes <i>et</i>                                                                                 |                                                                                                                                                                                                                                                                                                                                                                                                                         |                      |
| <input type="checkbox"/> Un biais de sélection                                                                                            |                                                                                                                                                                                                                                                                                                                                                                                                                         |                      |
| Si « oui », avoir évalué les risques de biais provenant :                                                                                 | 1,0 (0,0)                                                                                                                                                                                                                                                                                                                                                                                                               |                      |
| <input type="checkbox"/> Des méthodes utilisées pour déterminer l'exposition et les résultats <i>et</i>                                   |                                                                                                                                                                                                                                                                                                                                                                                                                         |                      |
| <input type="checkbox"/> De la présentation de résultats sélectionnés parmi plusieurs mesures ou analyses d'un résultat spécifique        |                                                                                                                                                                                                                                                                                                                                                                                                                         |                      |
| <input type="checkbox"/> Inclut seulement des ECR                                                                                         | 1,0 (0,0)                                                                                                                                                                                                                                                                                                                                                                                                               |                      |
| 10.                                                                                                                                       | Est-ce que les auteurs ont déclaré les sources de financement des études incluses dans la revue systématique?                                                                                                                                                                                                                                                                                                           | 1,0 (0,0)            |
|                                                                                                                                           | Si « oui » :                                                                                                                                                                                                                                                                                                                                                                                                            | 1,1 (0,3)            |
|                                                                                                                                           | <input type="checkbox"/> Doit avoir déclaré les sources de financement de chacune des études incluses dans la revue systématique.<br>Note : Il est aussi acceptable de déclarer que les évaluateurs ont cherché cette information, mais que celle-ci n'était pas fournie par les auteurs des études                                                                                                                     |                      |
| 11.                                                                                                                                       | Si une méta-analyse a été effectuée, est-ce que les auteurs ont utilisé des méthodes appropriées pour la combinaison statistique des résultats?                                                                                                                                                                                                                                                                         | 1,0 (0,0)            |

(suite)

Tableau (suite)

| Éléments | Énoncés de l'outil AMSTAR 2                                                                                                                                                                                                                                                                                        | Moyenne (écart-type) |
|----------|--------------------------------------------------------------------------------------------------------------------------------------------------------------------------------------------------------------------------------------------------------------------------------------------------------------------|----------------------|
|          | ECR                                                                                                                                                                                                                                                                                                                | 1,5 (0,9)            |
|          | Si « oui » :                                                                                                                                                                                                                                                                                                       |                      |
|          | <input type="checkbox"/> Les auteurs ont justifié la combinaison des données dans une méta-analyse                                                                                                                                                                                                                 |                      |
|          | <input type="checkbox"/> ET ils ont utilisé une technique de pondération appropriée pour combiner les résultats des études et ont fait les ajustements pour l'hétérogénéité, le cas échéant                                                                                                                        |                      |
|          | <input type="checkbox"/> ET ils ont examiné les causes de toute hétérogénéité                                                                                                                                                                                                                                      |                      |
|          | <input type="checkbox"/> Aucune méta-analyse effectuée                                                                                                                                                                                                                                                             | 1,0 (0,0)            |
|          | EINR                                                                                                                                                                                                                                                                                                               | 1,6 (1,1)            |
|          | Si « oui » :                                                                                                                                                                                                                                                                                                       |                      |
|          | <input type="checkbox"/> Les auteurs ont justifié la combinaison des données dans une méta-analyse                                                                                                                                                                                                                 |                      |
|          | <input type="checkbox"/> ET ils ont utilisé une technique de pondération appropriée pour combiner les résultats des études et ont fait les ajustements pour l'hétérogénéité, le cas échéant                                                                                                                        |                      |
|          | <input type="checkbox"/> ET ils ont combiné statistiquement les estimations d'effet des EINR qui ont été corrigées pour tenir compte des facteurs confusionnels, plutôt que de combiner des données brutes, ou ont justifié la combinaison de données brutes lorsque les effets corrigés n'étaient pas disponibles |                      |
|          | <input type="checkbox"/> ET ils ont déclaré des estimations de synthèse séparément pour les ECR et EINR lorsque les deux étaient inclus dans la revue systématique                                                                                                                                                 |                      |
|          | <input type="checkbox"/> Aucune méta-analyse effectuée                                                                                                                                                                                                                                                             | 1,0 (0,0)            |
| 12.      | Si une méta-analyse a été effectuée, est-ce que les auteurs ont évalué l'impact potentiel des risques de biais de chacune des études sur les résultats de la méta-analyse ou d'un autre type de synthèse de données probantes?                                                                                     | 1,0 (0,0)            |
|          | Si « oui » :                                                                                                                                                                                                                                                                                                       | 1,3 (0,6)            |
|          | <input type="checkbox"/> Avoir inclus uniquement des ECR à faible risque de biais                                                                                                                                                                                                                                  |                      |
|          | <input type="checkbox"/> OU si l'estimation globale était fondée sur des ECR ou EINR à un taux variable de risque de biais, les auteurs ont effectué des analyses afin d'étudier l'impact possible des risques de biais sur la synthèse des estimations de l'effet                                                 |                      |
|          | <input type="checkbox"/> Aucune méta-analyse effectuée                                                                                                                                                                                                                                                             | 1,0 (0,0)            |
| 13.      | Est-ce que les auteurs ont pris en compte le risque de biais de chacune des études lors de l'interprétation et de la discussion des résultats de la revue systématique?                                                                                                                                            | 1,0 (0,0)            |
|          | Si « oui » :                                                                                                                                                                                                                                                                                                       | 1,2 (0,6)            |
|          | <input type="checkbox"/> Avoir inclus seulement des ECR à faible risque de biais                                                                                                                                                                                                                                   |                      |
|          | <input type="checkbox"/> OU si des ECR ou EINR avec un risque de biais modéré ou élevé ont été inclus, la revue systématique incluait une discussion de l'effet probable des risques de biais sur les résultats                                                                                                    |                      |
| 14.      | Est-ce que les auteurs ont fourni une explication satisfaisante ainsi qu'une discussion de toute hétérogénéité observée dans les résultats de la revue systématique?                                                                                                                                               | 1,2 (0,5)            |
|          | Si « oui » :                                                                                                                                                                                                                                                                                                       | 1,1 (0,2)            |
|          | <input type="checkbox"/> Il n'y avait aucune hétérogénéité importante dans les résultats                                                                                                                                                                                                                           |                      |
|          | <input type="checkbox"/> OU s'il y avait présence d'hétérogénéité, les auteurs en ont examiné les sources et ont discuté de ses effets sur les résultats de la revue systématique                                                                                                                                  |                      |
| 15.      | S'ils ont réalisé une synthèse quantitative, est-ce que les auteurs ont effectué un examen adéquat des biais de publication (biais résultant de petites études) et discuté des effets probables sur les résultats de la revue systématique?                                                                        | 1,0 (0,0)            |
|          | Si « oui » :                                                                                                                                                                                                                                                                                                       | 1,2 (0,5)            |
|          | <input type="checkbox"/> Avoir effectué des graphiques ou des tests statistiques pour les biais de publication et discuté de la probabilité ainsi que de l'ampleur de l'effet du biais de publication                                                                                                              |                      |
|          | <input type="checkbox"/> Aucune méta-analyse effectuée                                                                                                                                                                                                                                                             | 1,0 (0,0)            |
| 16.      | Est-ce que les auteurs ont déclaré toutes les sources potentielles de conflit d'intérêts, incluant le financement reçu pour effectuer cette revue systématique?                                                                                                                                                    | 1,0 (0,0)            |
|          | Si « oui » :                                                                                                                                                                                                                                                                                                       | 1,0 (0,0)            |
|          | <input type="checkbox"/> Les auteurs n'ont déclaré aucun conflit d'intérêts OU                                                                                                                                                                                                                                     |                      |
|          | <input type="checkbox"/> Les auteurs ont décrit leurs sources de financement et la façon dont ils ont géré les conflits d'intérêts potentiels                                                                                                                                                                      |                      |

Notes : Le score moyen d'ambiguïté des énoncés, y compris les éléments indiqués au tableau 2. Le score maximum est de 7 points; échelle d'ambiguïté de 7 points (1 : très clair; 7 : très ambigu).

## ANNEXE 4 VERSION FRANCO-CANADIENNE OFFICIELLE DE L'OUTIL AMSTAR 2 : UN OUTIL D'ÉVALUATION CRITIQUE DE LA QUALITÉ DE REVUES SYSTÉMATIQUES QUI INCLUENT DES ÉTUDES D'INTERVENTION EN SOINS DE SANTÉ RANDOMISÉES OU NON RANDOMISÉES

### 1. Est-ce que les questions de recherche et les critères d'inclusion de la revue systématique comprenaient les composantes PICO?

|                                                       |                                                     |                              |
|-------------------------------------------------------|-----------------------------------------------------|------------------------------|
| Si oui :                                              | Optionnel (recommandé)                              |                              |
| <input type="checkbox"/> Population                   | <input type="checkbox"/> Échéancier pour les suivis | <input type="checkbox"/> Oui |
| <input type="checkbox"/> Intervention                 |                                                     | <input type="checkbox"/> Non |
| <input type="checkbox"/> Groupes de comparaison       |                                                     |                              |
| <input type="checkbox"/> Résultats ( <i>Outcome</i> ) |                                                     |                              |

### 2. Est-ce que le compte rendu de la revue systématique contenait un énoncé explicite indiquant que les méthodes de cette revue ont été établies avant de la réaliser, et est-ce qu'il y avait une justification de toute déviation significative du protocole?

|                                                                                                                              |                                                                                                                             |                                        |
|------------------------------------------------------------------------------------------------------------------------------|-----------------------------------------------------------------------------------------------------------------------------|----------------------------------------|
| Si « oui en partie » :<br>Les auteurs déclarent avoir écrit un protocole ou un guide qui inclut TOUS les éléments suivants : | Si « oui » :<br>En plus des critères du « oui en partie », le protocole devrait être enregistré et devrait avoir spécifié : |                                        |
| <input type="checkbox"/> La (Les) question(s) de recherche                                                                   | <input type="checkbox"/> Un plan de la méta-analyse/synthèse si nécessaire <i>et</i>                                        | <input type="checkbox"/> Oui           |
| <input type="checkbox"/> Une stratégie de recherche                                                                          | <input type="checkbox"/> Un plan pour examiner les causes d'hétérogénéité                                                   | <input type="checkbox"/> Oui en partie |
| <input type="checkbox"/> Les critères d'inclusion et d'exclusion                                                             | <input type="checkbox"/> Une justification pour toutes déviations du protocole                                              | <input type="checkbox"/> Non           |
| <input type="checkbox"/> Une évaluation des risques de biais                                                                 |                                                                                                                             |                                        |

### 3. Est-ce que les auteurs ont expliqué leurs méthodes de sélection des devis d'études inclus dans la revue systématique?

|                                                                                                                           |                              |
|---------------------------------------------------------------------------------------------------------------------------|------------------------------|
| Si « oui », la revue devrait inclure l'UN des éléments suivants :                                                         |                              |
| <input type="checkbox"/> Une explication pour avoir inclus uniquement des études/essais cliniques randomisés (ECR)        | <input type="checkbox"/> Oui |
| <input type="checkbox"/> OU une explication pour avoir inclus uniquement des études d'intervention non randomisées (EINR) | <input type="checkbox"/> Non |
| <input type="checkbox"/> OU une explication pour avoir inclus les deux : ECR et EINR                                      |                              |

### 4. Est-ce que les auteurs de la revue systématique ont utilisé une stratégie de recherche exhaustive des écrits?

|                                                                                                                                     |                                                                                                                               |                                        |
|-------------------------------------------------------------------------------------------------------------------------------------|-------------------------------------------------------------------------------------------------------------------------------|----------------------------------------|
| Si « oui en partie », TOUS les éléments suivants s'appliquent :                                                                     | Si « oui », il devrait aussi y avoir TOUS les éléments suivants :                                                             |                                        |
| <input type="checkbox"/> Avoir effectué leur recherche dans au moins deux bases de données (pertinentes à la question de recherche) | <input type="checkbox"/> Toutes les bibliographies/listes de références des études incluses ont été consultées                | <input type="checkbox"/> Oui           |
| <input type="checkbox"/> Avoir fourni des mots-clés ou des stratégies de recherche                                                  | <input type="checkbox"/> Les registres d'essais/d'études ont été consultés                                                    | <input type="checkbox"/> Oui en partie |
| <input type="checkbox"/> Avoir justifié les limites de publication (p. ex., la langue)                                              | <input type="checkbox"/> Des experts du domaine ont été inclus/consultés                                                      | <input type="checkbox"/> Non           |
|                                                                                                                                     | <input type="checkbox"/> Lorsque la situation le justifie, la littérature grise a été consultée                               |                                        |
|                                                                                                                                     | <input type="checkbox"/> Les recherches ont été effectuées à l'intérieur de 24 mois précédant la fin de la revue systématique |                                        |

### 5. Est-ce que la sélection des études de la revue systématique a été effectuée par au moins deux évaluateurs?

|                                                                                                                                                                                                                    |                              |
|--------------------------------------------------------------------------------------------------------------------------------------------------------------------------------------------------------------------|------------------------------|
| Si oui, choisir l'UN des éléments suivants :                                                                                                                                                                       |                              |
| <input type="checkbox"/> Au moins deux évaluateurs ont sélectionné de manière indépendante les études admissibles et sont parvenus à un consensus sur le choix des études à inclure                                | <input type="checkbox"/> Oui |
| <input type="checkbox"/> OU deux évaluateurs ont sélectionné un échantillon d'études admissibles et sont parvenus à un accord d'au moins 80 pour cent; les autres données ont été extraites par un des évaluateurs | <input type="checkbox"/> Non |

### 6. Est-ce que l'extraction des données a été effectuée par au moins deux évaluateurs?

|                                                                                                                                                                                                                              |                              |
|------------------------------------------------------------------------------------------------------------------------------------------------------------------------------------------------------------------------------|------------------------------|
| Si oui, choisir l'UN des éléments suivants :                                                                                                                                                                                 |                              |
| <input type="checkbox"/> Au moins deux évaluateurs sont parvenus à un consensus sur les données à extraire dans les études retenues                                                                                          | <input type="checkbox"/> Oui |
| <input type="checkbox"/> OU deux évaluateurs ont extrait les données d'un échantillon d'études admissibles et sont parvenus à un accord d'au moins 80 pour cent; les autres données ont été extraites par un des évaluateurs | <input type="checkbox"/> Non |

**7. Est-ce que les auteurs de la revue systématique ont fourni une liste des études exclues et ont justifié leurs exclusions?**

|                                                                                                                                                                                |                                                                                                             |                                                                                                        |
|--------------------------------------------------------------------------------------------------------------------------------------------------------------------------------|-------------------------------------------------------------------------------------------------------------|--------------------------------------------------------------------------------------------------------|
| Si « oui en partie » :                                                                                                                                                         | Si « oui », il doit aussi y avoir :                                                                         |                                                                                                        |
| <input type="checkbox"/> Une liste de toutes les études potentiellement pertinentes qui ont été consultées sous forme de texte intégral, mais exclues de la revue, est fournie | <input type="checkbox"/> Une justification de l'exclusion de chacune des études potentiellement pertinentes | <input type="checkbox"/> Oui<br><input type="checkbox"/> Oui en partie<br><input type="checkbox"/> Non |

**8. Est-ce que les auteurs de la revue systématique ont décrit les études incluses avec suffisamment de détails?**

|                                                                 |                                                                                                                                           |                                        |
|-----------------------------------------------------------------|-------------------------------------------------------------------------------------------------------------------------------------------|----------------------------------------|
| Si « oui en partie », TOUS les éléments suivants s'appliquent : | Si « oui », il devrait aussi y avoir TOUS les éléments suivants :                                                                         |                                        |
| <input type="checkbox"/> Description des populations            | <input type="checkbox"/> Description de la population de façon détaillée                                                                  | <input type="checkbox"/> Oui           |
| <input type="checkbox"/> Description des interventions          | <input type="checkbox"/> Description des interventions de façon détaillée (incluant les dosages, lorsque la situation l'indique)          | <input type="checkbox"/> Oui en partie |
| <input type="checkbox"/> Description des groupes de comparaison | <input type="checkbox"/> Description des groupes de comparaison de façon détaillée (incluant les dosages, lorsque la situation l'indique) | <input type="checkbox"/> Non           |
| <input type="checkbox"/> Description des résultats              | <input type="checkbox"/> Description du milieu de l'étude de façon détaillée                                                              |                                        |
| <input type="checkbox"/> Description des devis de recherche     | <input type="checkbox"/> Échéancier pour les suivis                                                                                       |                                        |

**9. Est-ce que les auteurs ont utilisé une technique satisfaisante pour évaluer le risque de biais pour chacune des études incluses dans la revue systématique?**

|                                                                                                                                                                                                                        |                                                                                                                                    |                                                                                                                              |
|------------------------------------------------------------------------------------------------------------------------------------------------------------------------------------------------------------------------|------------------------------------------------------------------------------------------------------------------------------------|------------------------------------------------------------------------------------------------------------------------------|
| <b>ECR :</b>                                                                                                                                                                                                           |                                                                                                                                    |                                                                                                                              |
| Si « oui en partie », avoir évalué les risques de biais suivants :                                                                                                                                                     | Si « oui », avoir évalué aussi les risques de biais suivants :                                                                     |                                                                                                                              |
| <input type="checkbox"/> Une assignation non dissimulée <i>et</i>                                                                                                                                                      | <input type="checkbox"/> Une séquence d'assignation partiellement randomisée <i>et</i>                                             | <input type="checkbox"/> Oui                                                                                                 |
| <input type="checkbox"/> L'absence de mise à l'insu des patients et des évaluateurs lors de l'évaluation des résultats (non nécessaire pour des résultats objectifs, tels que les mortalités toutes causes confondues) | <input type="checkbox"/> La présentation de résultats sélectionnés parmi plusieurs mesures ou analyses d'un résultat spécifique    | <input type="checkbox"/> Oui en partie<br><input type="checkbox"/> Non<br><input type="checkbox"/> Inclut seulement des EINR |
| <b>EINR :</b>                                                                                                                                                                                                          |                                                                                                                                    |                                                                                                                              |
| Si « oui en partie », avoir évalué les risques de biais provenant de :                                                                                                                                                 | Si « oui », avoir évalué aussi les risques de biais provenant :                                                                    |                                                                                                                              |
| <input type="checkbox"/> Variables confusionnelles <i>et</i>                                                                                                                                                           | <input type="checkbox"/> Des méthodes utilisées pour déterminer l'exposition et les résultats <i>et</i>                            | <input type="checkbox"/> Oui                                                                                                 |
| <input type="checkbox"/> Un biais de sélection                                                                                                                                                                         | <input type="checkbox"/> De la présentation de résultats sélectionnés parmi plusieurs mesures ou analyses d'un résultat spécifique | <input type="checkbox"/> Oui en partie<br><input type="checkbox"/> Non<br><input type="checkbox"/> Inclut seulement des ECR  |

**10. Est-ce que les auteurs ont déclaré les sources de financement des études incluses dans la revue systématique?**

|                                                                                                                                                                                                                                                                                                  |                                                              |
|--------------------------------------------------------------------------------------------------------------------------------------------------------------------------------------------------------------------------------------------------------------------------------------------------|--------------------------------------------------------------|
| Si oui :                                                                                                                                                                                                                                                                                         |                                                              |
| <input type="checkbox"/> Doit avoir déclaré les sources de financement de chacune des études incluses dans la revue systématique. Note : Il est aussi acceptable de déclarer que les évaluateurs ont cherché cette information, mais que celle-ci n'était pas fournie par les auteurs des études | <input type="checkbox"/> Oui<br><input type="checkbox"/> Non |

**11. Si une méta-analyse a été effectuée, est-ce que les auteurs ont utilisé des méthodes appropriées pour la combinaison statistique des résultats?**

|                                                                                                                                                                                             |  |                                                        |
|---------------------------------------------------------------------------------------------------------------------------------------------------------------------------------------------|--|--------------------------------------------------------|
| <b>ECR :</b>                                                                                                                                                                                |  |                                                        |
| Si « oui » :                                                                                                                                                                                |  |                                                        |
| <input type="checkbox"/> Les auteurs ont justifié la combinaison des données dans une méta-analyse                                                                                          |  | <input type="checkbox"/> Oui                           |
| <input type="checkbox"/> ET ils ont utilisé une technique de pondération appropriée pour combiner les résultats des études et ont fait les ajustements pour l'hétérogénéité, le cas échéant |  | <input type="checkbox"/> Non                           |
| <input type="checkbox"/> ET ils ont examiné les causes de toute hétérogénéité                                                                                                               |  | <input type="checkbox"/> Aucune méta-analyse effectuée |

**EINR :**

Si « oui » :

- |                                                                                                                                                                                                                                                                                                                      |                                                        |
|----------------------------------------------------------------------------------------------------------------------------------------------------------------------------------------------------------------------------------------------------------------------------------------------------------------------|--------------------------------------------------------|
| <input type="checkbox"/> Les auteurs ont justifié la combinaison des données dans une méta-analyse                                                                                                                                                                                                                   | <input type="checkbox"/> Oui                           |
| <input type="checkbox"/> ET ils ont utilisé une technique de pondération appropriée pour combiner les résultats des études et ont fait les ajustements pour l'hétérogénéité, le cas échéant                                                                                                                          | <input type="checkbox"/> Non                           |
| <input type="checkbox"/> ET ils ont combiné statistiquement les estimations d'effet des EINR qui ont été corrigées pour tenir compte des facteurs confusionnelles, plutôt que de combiner des données brutes, ou ont justifié la combinaison de données brutes lorsque les effets corrigés n'étaient pas disponibles | <input type="checkbox"/> Aucune méta-analyse effectuée |

**12. Si une méta-analyse a été effectuée, est-ce que les auteurs ont évalué l'impact potentiel des risques de biais de chacune des études sur les résultats de la méta-analyse ou d'un autre type de synthèse de données probantes?**

Si « oui » :

- |                                                                                                                                                                                                                                                                    |                                                        |
|--------------------------------------------------------------------------------------------------------------------------------------------------------------------------------------------------------------------------------------------------------------------|--------------------------------------------------------|
| <input type="checkbox"/> Avoir inclus uniquement des ECR à faible risque de biais                                                                                                                                                                                  | <input type="checkbox"/> Oui                           |
| <input type="checkbox"/> OU si l'estimation globale était fondée sur des ECR ou EINR à un taux variable de risque de biais, les auteurs ont effectué des analyses afin d'étudier l'impact possible des risques de biais sur la synthèse des estimations de l'effet | <input type="checkbox"/> Non                           |
|                                                                                                                                                                                                                                                                    | <input type="checkbox"/> Aucune méta-analyse effectuée |

**13. Est-ce que les auteurs ont pris en compte le risque de biais de chacune des études lors de l'interprétation et de la discussion des résultats de la revue systématique?**

Si « oui » :

- |                                                                                                                                                                                                                 |                              |
|-----------------------------------------------------------------------------------------------------------------------------------------------------------------------------------------------------------------|------------------------------|
| <input type="checkbox"/> Avoir inclus seulement des ECR à faible risque de biais                                                                                                                                | <input type="checkbox"/> Oui |
| <input type="checkbox"/> OU si des ECR ou EINR avec un risque de biais modéré ou élevé ont été inclus, la revue systématique incluait une discussion de l'effet probable des risques de biais sur les résultats | <input type="checkbox"/> Non |

**14. Est-ce que les auteurs ont fourni une explication satisfaisante ainsi qu'une discussion de toute hétérogénéité observée dans les résultats de la revue systématique?**

Si « oui » :

- |                                                                                                                                                                                   |                              |
|-----------------------------------------------------------------------------------------------------------------------------------------------------------------------------------|------------------------------|
| <input type="checkbox"/> Il n'y avait aucune hétérogénéité importante dans les résultats                                                                                          | <input type="checkbox"/> Oui |
| <input type="checkbox"/> OU s'il y avait présence d'hétérogénéité, les auteurs en ont examiné les sources et ont discuté de ses effets sur les résultats de la revue systématique | <input type="checkbox"/> Non |

**15. S'ils ont réalisé une synthèse quantitative, est-ce que les auteurs ont effectué un examen adéquat des biais de publication (biais résultant de petites études) et discuté des effets probables sur les résultats de la revue systématique?**

Si « oui » :

- |                                                                                                                                                                                                       |                                                        |
|-------------------------------------------------------------------------------------------------------------------------------------------------------------------------------------------------------|--------------------------------------------------------|
| <input type="checkbox"/> Avoir effectué des graphiques ou des tests statistiques pour les biais de publication et discuté de la probabilité ainsi que de l'ampleur de l'effet du biais de publication | <input type="checkbox"/> Oui                           |
|                                                                                                                                                                                                       | <input type="checkbox"/> Non                           |
|                                                                                                                                                                                                       | <input type="checkbox"/> Aucune méta-analyse effectuée |

**16. Est-ce que les auteurs ont rapporté toutes les sources potentielles de conflit d'intérêts, incluant le financement reçu pour effectuer cette revue systématique?**

Si « oui » :

- |                                                                                                                                               |                              |
|-----------------------------------------------------------------------------------------------------------------------------------------------|------------------------------|
| <input type="checkbox"/> Les auteurs n'ont déclaré aucun conflit d'intérêts OU                                                                | <input type="checkbox"/> Oui |
| <input type="checkbox"/> Les auteurs ont décrit leurs sources de financement et la façon dont ils ont géré les conflits d'intérêts potentiels | <input type="checkbox"/> Non |
